# Supplementary material for: Morphometric, Hemodynamic, and Biomechanical Factors Influencing Blood Flow and Oxygen Concentration in the Human Lamina Cribrosa
Source: PubMed Central journal article supplement — Invest Ophthalmol Vis Sci. 2020 Apr 9;61(4):3. doi: 10.1167/iovs.61.4.3 (PMC7401712; doi:10.1167/iovs.61.4.3), 2020-04-09
Supplement: iovs-61-4-3_s001.pdf [file iovs-61-4-3_s001.pdf]

# Supplementary material A

## Geometric parameters used in the FE model of the eye

| Tissue                            | Units | Value |
|-----------------------------------|-------|-------|
| Eyeball Inner Radius              | mm    | 12    |
| Sclera Thickness                  | mm    | 0.9   |
| Choroid Thickness                 | mm    | 0.2   |
| Retinal Thickness                 | mm    | 0.249 |
| Dura radius                       | mm    | 2     |
| Papillary border tissue thickness | mm    | 0.1   |
| Pia thickness                     | mm    | 0.08  |
| LC Thickness                      | mm    | 0.3   |

4  
5  
6  
7  
8  
9  
10  
11  
12  
13  
14  
15  
16  
17  
18  
19  
20  
21  
22  
23  
24  
25  
26  
27  
28

29  
30  
31

## Supplementary material B

Constants used in hemodynamics and oxygen consumption simulation

|                             |                                              | Value                                                        | Reference    |
|-----------------------------|----------------------------------------------|--------------------------------------------------------------|--------------|
| <i>Blood parameters</i>     |                                              |                                                              |              |
| $\rho$                      | Blood density                                | 1060 kg/m <sup>3</sup>                                       | 75           |
| $C_{MM}$                    | Michellis-Menten constant for<br>blood       | $1 \times 10^{-3}$ mol/m <sup>3</sup>                        | 76           |
| $C_{Hb}$                    | Oxygen concentration of in a<br>haemoglobin  | $0.1 \times 10^{-3}$ mol/m <sup>3</sup>                      | 38           |
| H                           | Inlet Haematocrit                            | 0.45                                                         | 38           |
| $\alpha$                    | Oxygen solubility coefficient in<br>Tissue   | $1.45 \times 10^{-3} \frac{\text{mol}}{\text{m}^3}$<br>/mmHg | 76           |
| K                           | Intravascular resistance to oxygen           | $1.06 \times 10^{-8}$ s/m <sup>2</sup>                       | 40           |
| $C_{In}$                    | Inlet free oxygen concentration              | 0.12 mol/m <sup>3</sup>                                      | 39           |
| <i>Tissue parameters</i>    |                                              |                                                              |              |
| D                           | Diffusion coefficient of oxygen in<br>tissue | $2.385 \times 10^{-9}$ m <sup>2</sup> /s                     | 77           |
| $M_0$                       | Maximum oxygen consumption                   | $0.000225 \frac{\text{mol}}{\text{m}^3} / \text{s}$          | Approximated |
| <i>Geometric parameters</i> |                                              |                                                              |              |
| $R_c$                       | Initial Blood Capillary radius               | 4 $\mu\text{m}$                                              | Approximated |

32
